# Supplementary material
Source: Springer Nature journal article supplement (https://www.springermedizin.de/resource/supplementary/13584_2011_21_MOESM1_ESM.pdf/9676804)

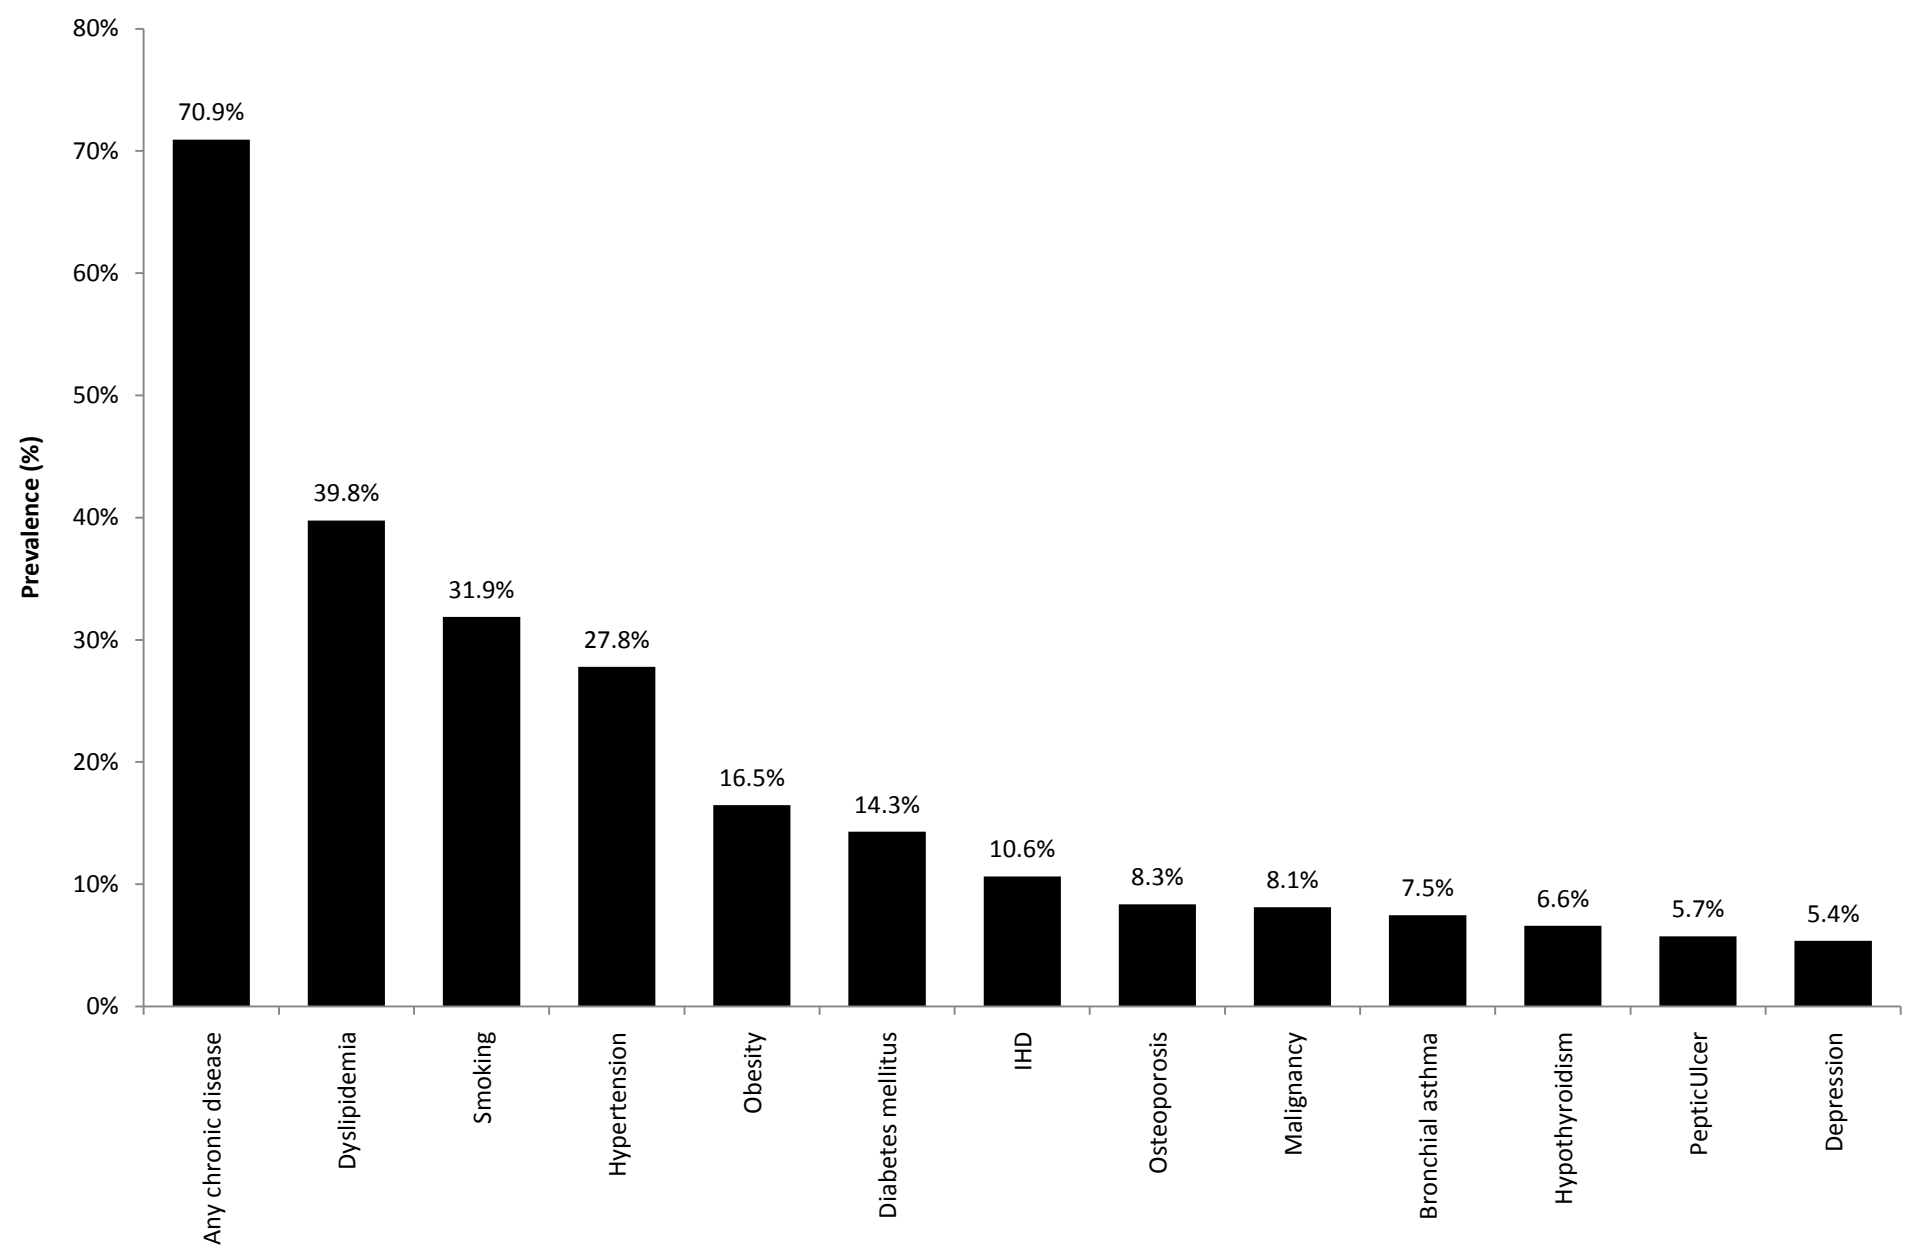

Supplement: MOESM1 [file 9676804]
